# Supplementary material for: Fenton-RAFT polymerization in organic media
Source: Royal Society of Chemistry journal article supplement (doi:10.1039/d4py00027g), 2024-01-01
Supplement: d4py00027g1.pdf [file d4py00027g1.pdf]

## Fenton–RAFT Polymerization in Organic Media

Amin Reyhani,<sup>a,b</sup> Ross A.L. Wylie,<sup>a</sup> Arunjunai R.S. Santha Kumar,<sup>a</sup> Alicia Rasines Mazo,<sup>a</sup> Omid Mazaheri,<sup>a</sup> Kathryn A. Mumford,<sup>a</sup> and Greg G. Qiao<sup>a,\*</sup>

a. Department of Chemical Engineering, The University of Melbourne, Parkville, Melbourne, VIC 3010, Australia.

b. Department of Chemistry, Technical University of Darmstadt, Peter-Grünberg-Straße 4, 64287 Darmstadt, Germany.

| <b>Contents</b>                                         | <b>Page</b> |
|---------------------------------------------------------|-------------|
| Characterization date of the Fe(II)-MOF particles       | 2           |
| Deoxygenated organic Fenton-RAFT polymerization         | 3           |
| Deoxygenated organic Fenton-RAFT polymerization         | 4           |
| Kinetic study of the organic Fenton-RAFT polymerization | 5           |
| Fenton reaction-mediated bulk polymerization            | 6           |
| Effect of MA/DMSO ratio on the polymerization rate      | 7           |
| Recycling experiments                                   | 8           |
| Temperature effect on the polymerization rate           | 9           |
| References                                              | 10          |

- Characterization date of the Fe(II)-MOF particles

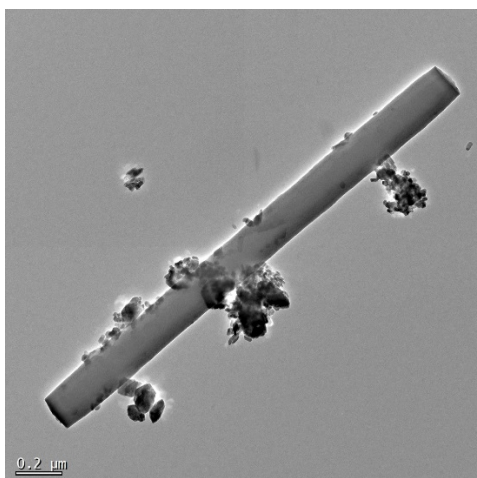

Figure S1. HR-TEM image of the employed Fe(II)-MOF particles in this study.

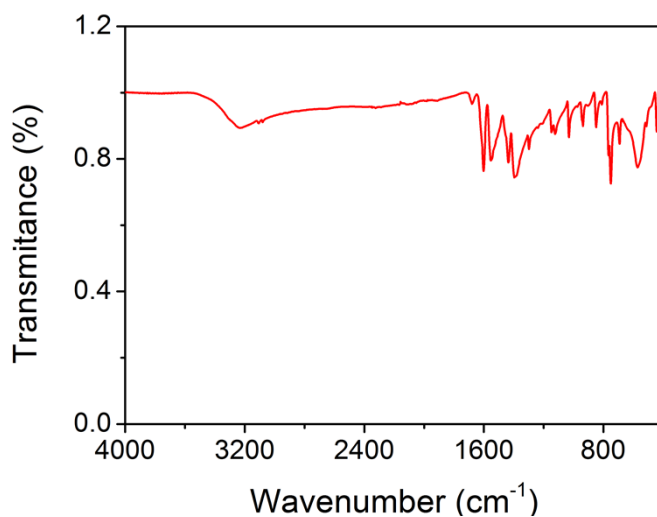

Figure S2. FTIR spectra of the employed Fe(II)-MOF particles.

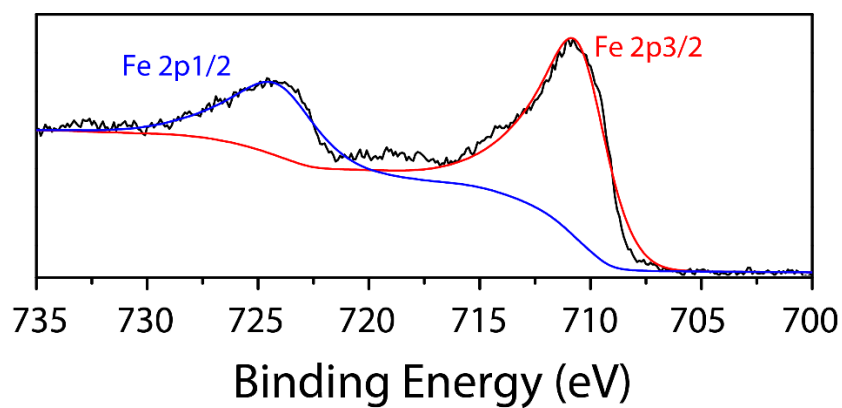

Figure S3. XPS analysis of the Fe(II)-MOF particles before the polymerization.<sup>1</sup>

## - Non-deoxygenated organic Fenton-RAFT polymerization

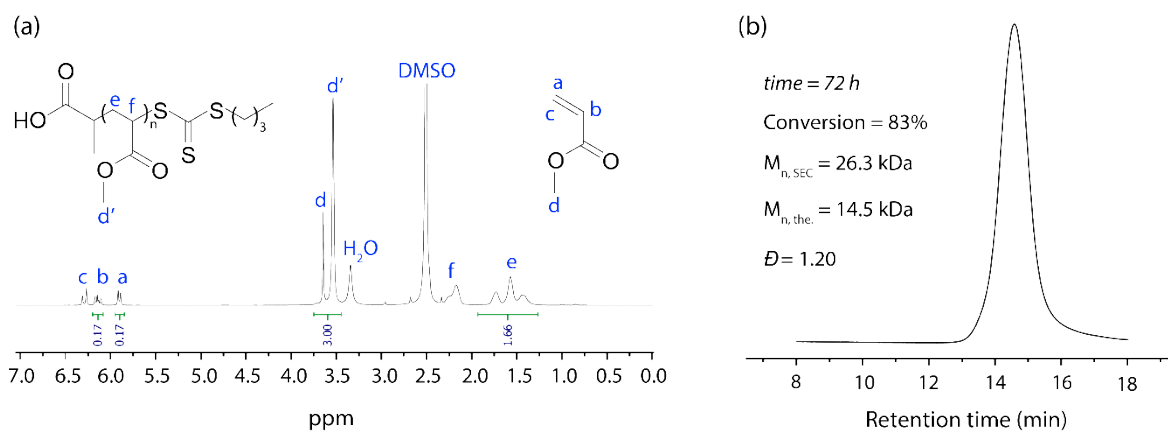

**Figure S4.**  $^1\text{H}$  NMR and SEC peaks of the synthesized PMA with TTC-1 *via* the non-deoxygenated Fenton-RAFT in DMSO.  $[\text{Fe(II)-MOF}] = 1.6 \text{ mg mL}^{-1}$ , and  $[\text{H}_2\text{O}_2]_0 = 35 \text{ mM}$ .

- Deoxygenated organic Fenton-RAFT polymerization

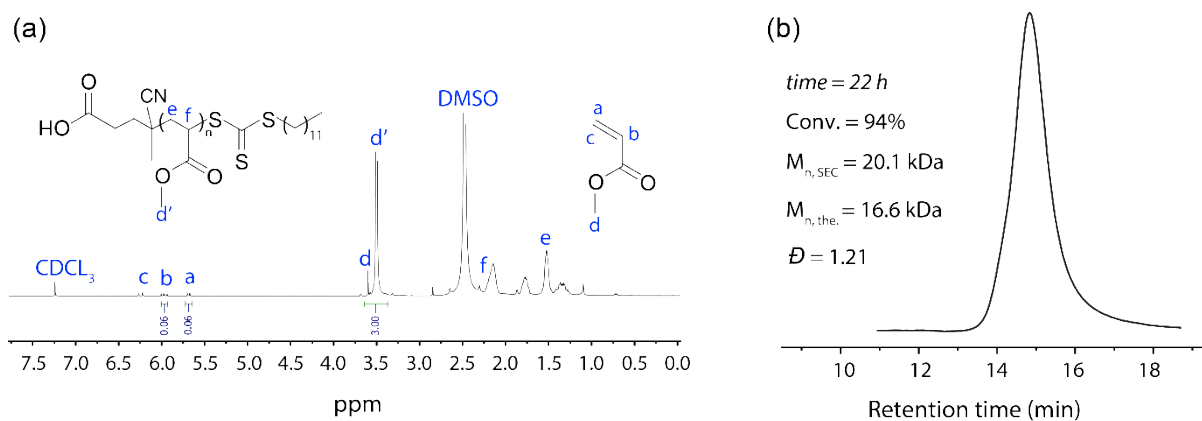

**Figure S5.**  $^1\text{H}$  NMR and SEC peaks of the synthesized PMA with TTC-2 via the deoxygenated Fenton-RAFT in DMSO.  $[\text{Fe(II)-MOF}] = 3.2 \text{ mg mL}^{-1}$ , and  $[\text{H}_2\text{O}_2]_0 = 70 \text{ mM}$ .

- **Kinetic study of the organic Fenton-RAFT polymerization**

**Table S1.** Characterization data of the synthesized PMA via the kinetic study when [Fe(II)-MOF] = 9.6 mg mL<sup>-1</sup> and [H<sub>2</sub>O<sub>2</sub>]<sub>0</sub> = 70 mM.

| <b>time (h)</b> | <b>Conversion (%)</b> | <b>M<sub>n, the.</sub> (kDa)</b> | <b>M<sub>n, SEC</sub> (kDa)</b> | <b>Đ (-)</b> |
|-----------------|-----------------------|----------------------------------|---------------------------------|--------------|
| 0.5             | 2                     | -                                | -                               | -            |
| 1               | 15                    | -                                | -                               | -            |
| 3               | 34                    | 6.1                              | 3.2                             | 1.34         |
| 5               | 46                    | 8.2                              | 4.3                             | 1.35         |
| 7               | 56                    | 9.9                              | 7.4                             | 1.26         |
| 9               | 71                    | 12.5                             | 10.0                            | 1.19         |
| 11              | 80                    | 14.1                             | 12.8                            | 1.15         |

- Fenton reaction-mediated bulk polymerization

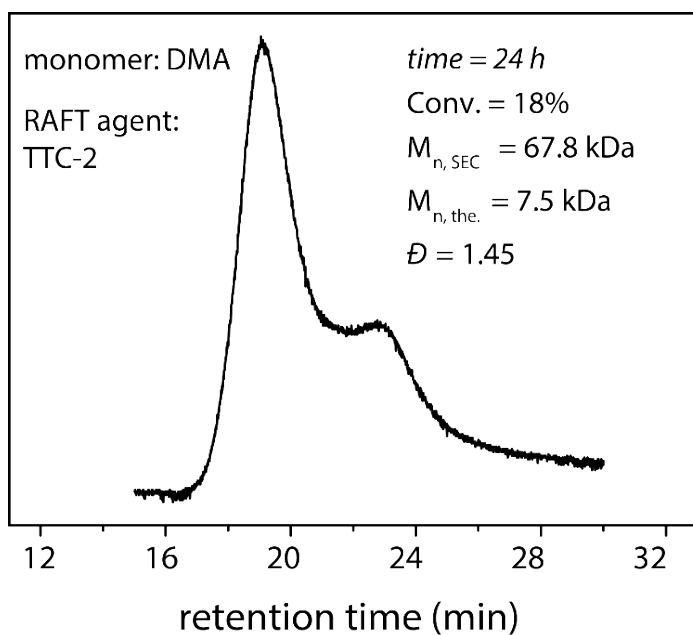

**Figure S6.** SEC chromatograms of PDMA synthesized via a bulk RAFT polymerization.  $[\text{Fe(II)-MOF}] = 9.6 \text{ mg mL}^{-1}$ , and  $[\text{H}_2\text{O}_2]_0 = 70 \text{ mM}$ .

*Note:*  $M_{n,SEC}$  and  $\bar{D}$  values of this polymer were obtained by using a light scattering detector coupled with SEC through an aqueous system.

- Effect of MA/DMSO ratio on the polymerization rate

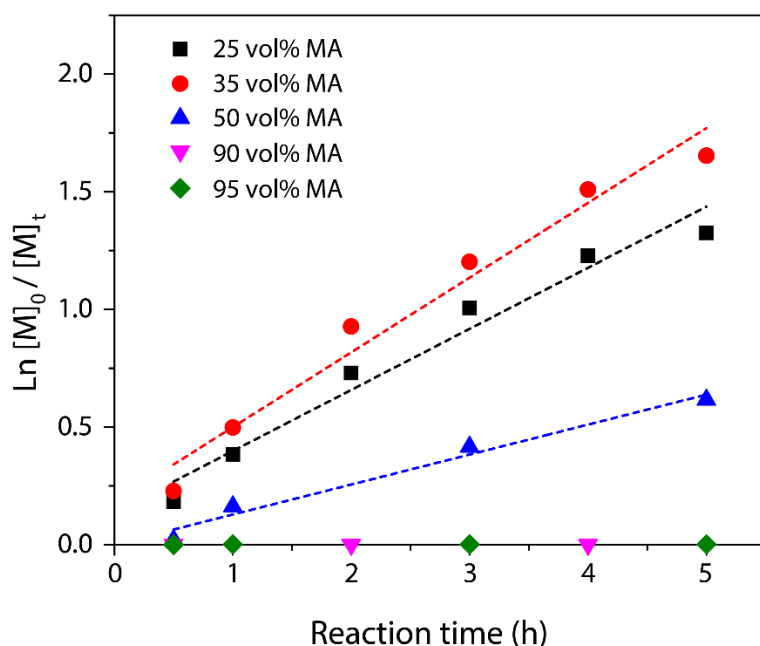

**Figure S7.** Rate of organic Fenton-RAFT polymerization at different volume percentages of MA in DMSO when targeted DP = 200, [Fe(II)-MOF]<sub>0</sub> = 9.6 mg mL<sup>-1</sup> and [H<sub>2</sub>O<sub>2</sub>] = 70 mM.

**Table S2.** The experimental data obtained from the reactions comparing polymerization rates at different MA/DMSO volume ratios.

| MA/DMSO (vol%) | Time (h) | Conversion (%) | Ln [M] <sub>0</sub> /[M] <sub>t</sub> | M <sub>n, SEC</sub> (kDa) | Đ (-) |
|----------------|----------|----------------|---------------------------------------|---------------------------|-------|
| 25             | 0.5      | 16.7           | 0.183                                 | -                         | -     |
|                | 1        | 31.9           | 0.384                                 | 3.0                       | 1.19  |
|                | 2        | 51.8           | 0.730                                 | 6.6                       | 1.15  |
|                | 3        | 63.4           | 1.006                                 | 9.1                       | 1.13  |
|                | 4        | 70.7           | 1.228                                 | 10.7                      | 1.11  |
|                | 5        | 73.4           | 1.325                                 | 11.8                      | 1.10  |
| 35             | 0.5      | 20.4           | 0.228                                 | -                         | -     |
|                | 1        | 39.2           | 0.498                                 | 4.1                       | 1.20  |
|                | 2        | 60.4           | 0.927                                 | 8.4                       | 1.14  |
|                | 3        | 69.9           | 1.202                                 | 11.2                      | 1.15  |
|                | 4        | 77.9           | 1.509                                 | 13.0                      | 1.12  |
|                | 5        | 80.9           | 1.653                                 | 13.9                      | 1.11  |
| 50             | 0.5      | 2              | 0.020                                 | -                         | -     |
|                | 1        | 15             | 0.163                                 | -                         | -     |
|                | 2        | Not taken      | Not taken                             | -                         | -     |
|                | 3        | 34             | 0.416                                 | 3.2                       | 1.34  |
|                | 4        | Not taken      | Not taken                             | -                         | -     |
|                | 5        | 46             | 0.616                                 | 4.3                       | 1.35  |
| 90 and 95      | 0.5      | 0              | 0                                     | -                         | -     |
|                | 1        | 0              | 0                                     | -                         | -     |
|                | 2        | 0              | 0                                     | -                         | -     |
|                | 3        | 0              | 0                                     | -                         | -     |
|                | 4        | 0              | 0                                     | -                         | -     |
|                | 5        | 0              | 0                                     | -                         | -     |

- **Recycling experiments**

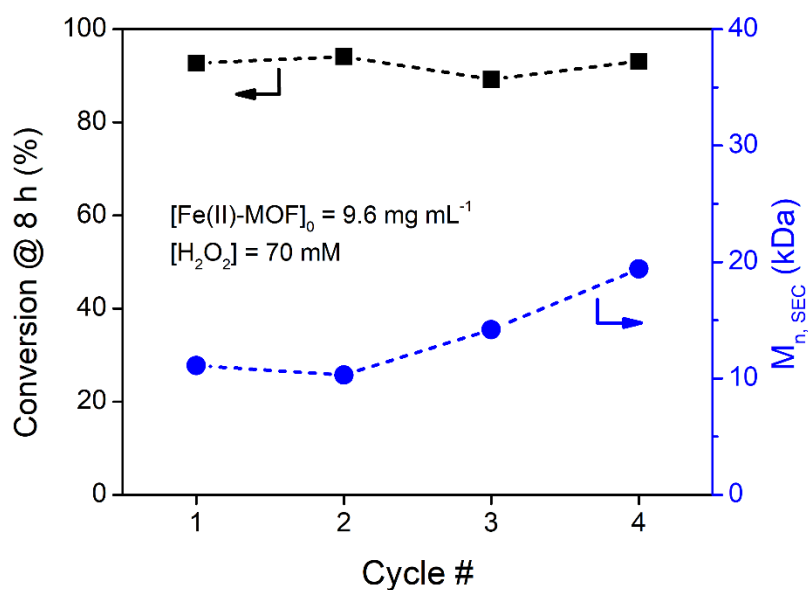

**Figure S8.** Recyclability of the Fe(II)-MOF particles: monomer conversion after 8 h via recycling runs of Fe(II)-MOF particles in the organic Fenton-RAFT polymerization when CTA was TTC-3 and targeted DP was 200.

**Table S3.** Characterization data of the synthesized PMA after 8 h *via* the experiments with recovered MOFs when targeted DP = 200,  $[Fe(II)-MOF]_0 = 9.6 \text{ mg mL}^{-1}$  and  $[H_2O_2] = 70 \text{ mM}$ .

| Cycle # | Conversion (%) | $M_{n, SEC}$ (kDa) | $\bar{D}$ (-) |
|---------|----------------|--------------------|---------------|
| 1       | 92.7           | 11.1               | 1.15          |
| 2       | 94.1           | 10.3               | 1.11          |
| 3       | 89.2           | 14.2               | 1.10          |
| 4       | 93.1           | 19.4               | 1.12          |



- Temperature effect on the polymerization rate

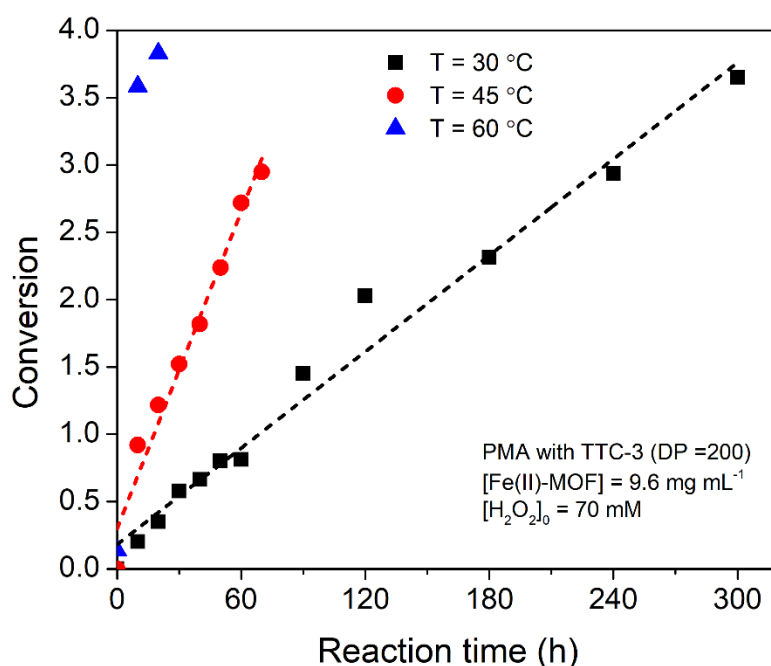

**Figure S9.** Rate of organic Fenton-RAFT polymerization at different temperatures ( $T = 30, 45,$  and  $60\text{ }^{\circ}\text{C}$ ) when targeted  $\text{DP} = 200$ ,  $[\text{Fe(II)-MOF}]_0 = 9.6\text{ mg mL}^{-1}$  and  $[\text{H}_2\text{O}_2] = 70\text{ mM}$ .

**Table S4.** Characterization data of the synthesized PMA in the experiments with different  $T$ s when targeted CTA is TTC-3,  $\text{DP} = 200$ ,  $[\text{Fe(II)-MOF}]_0 = 9.6\text{ mg mL}^{-1}$ , and  $[\text{H}_2\text{O}_2] = 70\text{ mM}$ .

| $T\ (^{\circ})$ | Time (min) | Conversion (%) | $M_{n,\text{the.}}$ (kDa) | $M_{n,\text{SEC}}$ (kDa) | $\bar{D}$ (-) |
|-----------------|------------|----------------|---------------------------|--------------------------|---------------|
| 30              | 0          | 0.0            | -                         | -                        | -             |
|                 | 10         | 18.3           | -                         | -                        | -             |
|                 | 20         | 29.6           | 5.4                       | 3.0                      | 1.19          |
|                 | 30         | 43.9           | 7.8                       | 4.6                      | 1.22          |
|                 | 40         | 48.5           | 8.6                       | 6.0                      | 1.21          |
|                 | 50         | 55.2           | 9.8                       | 7.5                      | 1.19          |
|                 | 60         | 55.6           | 9.9                       | 8.5                      | 1.16          |
|                 | 90         | 76.6           | 13.5                      | 11.1                     | 1.18          |
|                 | 120        | 86.8           | 15.2                      | 12.8                     | 1.19          |
|                 | 180        | 90.1           | 15.8                      | 14.8                     | 1.21          |
|                 | 240        | 94.7           | 16.6                      | 16.0                     | 1.22          |
| 300             | 97.4       | 17.0           | 16.7                      | 1.23                     |               |
| 45              | 0          | 0.0            | -                         | -                        | -             |
|                 | 10         | 60.2           | 10.7                      | 6.7                      | 1.19          |
|                 | 20         | 70.4           | 12.4                      | 8.8                      | 1.15          |
|                 | 30         | 78.2           | 13.8                      | 10.2                     | 1.15          |
|                 | 40         | 83.8           | 14.8                      | 11.0                     | 1.15          |
|                 | 50         | 89.3           | 15.7                      | 12.2                     | 1.16          |
|                 | 60         | 93.4           | 16.3                      | 13.1                     | 1.21          |
|                 | 70         | 94.8           | 16.6                      | 13.5                     | 1.17          |
| 60              | 0          | 12.7           | -                         | -                        | -             |
|                 | 10         | 97.2           | 17022.122                 | 10802                    | 1.30          |
|                 | 20         | 97.8           | 17126.096                 | 10684                    | 1.31          |

## References

1. A. Reyhani, H. Ranji-Burachaloo, T. G. McKenzie, Q. Fu and G. G. Qiao, *Macromolecules*, 2019, **52**, 3278-3287.
